# Supplementary material for: Features of the conformation of galunisertib molecules in the crystal structures of its solvates
Source: Royal Society of Chemistry journal article supplement (doi:10.1039/d1ce01300a), 2021-01-01
Supplement: d1ce01300a1.pdf [file d1ce01300a1.pdf]

## ELECTRONIC SUPPLEMENTARY INFORMATION

### Features of the conformation of galunisertib molecules in the crystal structures of its solvates

Viktor N. Serezhkin,\* Anton V. Savchenkov

*Samara National Research University, Samara, Russian Federation*

\* *E-mail:* [serezhkin@samsu.ru](mailto:serezhkin@samsu.ru)

The following Tables S1 and S2 include these characteristics of atomic interactions:

- $k$  – the number of pyramids representing interatomic contacts of a given type;
- $d_{\min}$  and  $d_{\max}$  (Å) – distances for the shortest and the longest contact respectively;
- $S$  (Å<sup>2</sup>) – the total surface area of all faces corresponding to the given type of contacts;
- $V$  (Å<sup>3</sup>) – the total volume of all pyramids corresponding to the given type of contacts;
- $\Delta_S$  (%) – partial contributions of contacts to the total surface area of the corresponding faces.

The last column  $\Sigma$  shows the cumulative values for each molecule.

Table S1. Characteristics of chemical bonds of GAL molecules in different GAL·Q solvates (VD polyhedra faces with RF = 1)

| Solvate | Solvent molecule                 |                         | H/C    | C/C    | H/N   | C/N    | N/N   | C/O   | $\Sigma$ |
|---------|----------------------------------|-------------------------|--------|--------|-------|--------|-------|-------|----------|
| sI      | H <sub>2</sub> O                 | <i>k</i>                | 34     | 44     | 4     | 16     | 2     | 2     | 102      |
|         |                                  | <i>d</i> <sub>min</sub> | 0.95   | 1.36   | 0.88  | 1.32   | 1.34  | 1.24  | 0.88     |
|         |                                  | <i>d</i> <sub>max</sub> | 0.99   | 1.56   | 0.88  | 1.46   | 1.34  | 1.24  | 1.56     |
|         |                                  | <i>S</i>                | 183.07 | 290.21 | 22.04 | 100.04 | 12.94 | 13.67 | 621.98   |
|         |                                  | <i>V</i>                | 29.40  | 68.70  | 3.23  | 22.49  | 2.90  | 2.83  | 129.55   |
|         |                                  | $\Delta_S$              | 29.43  | 46.66  | 3.54  | 16.08  | 2.08  | 2.20  | 100.00   |
| sII     | CH <sub>4</sub> O                | <i>k</i>                | 34     | 44     | 4     | 16     | 2     | 2     | 102      |
|         |                                  | <i>d</i> <sub>min</sub> | 0.95   | 1.37   | 0.89  | 1.32   | 1.35  | 1.24  | 0.89     |
|         |                                  | <i>d</i> <sub>max</sub> | 0.99   | 1.55   | 0.91  | 1.46   | 1.35  | 1.24  | 1.55     |
|         |                                  | <i>S</i>                | 174.65 | 275.10 | 22.86 | 98.48  | 13.67 | 13.61 | 598.37   |
|         |                                  | <i>V</i>                | 28.08  | 65.32  | 3.42  | 22.20  | 3.07  | 2.82  | 124.91   |
|         |                                  | $\Delta_S$              | 29.19  | 45.97  | 3.82  | 16.46  | 2.28  | 2.27  | 100.00   |
| sIII    | C <sub>2</sub> H <sub>6</sub> O  | <i>k</i>                | 34     | 44     | 4     | 16     | 2     | 2     | 102      |
|         |                                  | <i>d</i> <sub>min</sub> | 0.93   | 1.36   | 0.91  | 1.31   | 1.33  | 1.24  | 0.91     |
|         |                                  | <i>d</i> <sub>max</sub> | 0.97   | 1.55   | 0.93  | 1.46   | 1.33  | 1.24  | 1.55     |
|         |                                  | <i>S</i>                | 185.25 | 285.56 | 23.66 | 105.98 | 13.14 | 14.53 | 628.11   |
|         |                                  | <i>V</i>                | 29.11  | 67.31  | 3.63  | 23.80  | 2.92  | 2.99  | 129.76   |
|         |                                  | $\Delta_S$              | 29.49  | 45.46  | 3.77  | 16.87  | 2.09  | 2.31  | 100.00   |
| sIV     | C <sub>2</sub> H <sub>6</sub> O  | <i>k</i>                | 34     | 44     | 4     | 16     | 2     | 2     | 102      |
|         |                                  | <i>d</i> <sub>min</sub> | 0.95   | 1.36   | 0.88  | 1.32   | 1.35  | 1.24  | 0.88     |
|         |                                  | <i>d</i> <sub>max</sub> | 0.99   | 1.55   | 0.88  | 1.46   | 1.35  | 1.24  | 1.55     |
|         |                                  | <i>S</i>                | 186.26 | 267.67 | 23.06 | 95.07  | 11.72 | 13.48 | 597.25   |
|         |                                  | <i>V</i>                | 29.90  | 63.50  | 2.38  | 21.41  | 2.63  | 2.78  | 122.61   |
|         |                                  | $\Delta_S$              | 31.19  | 44.82  | 3.86  | 15.92  | 1.96  | 2.26  | 100.00   |
| sV      | C <sub>3</sub> H <sub>8</sub> O  | <i>k</i>                | 34     | 44     | 4     | 16     | 2     | 2     | 102      |
|         |                                  | <i>d</i> <sub>min</sub> | 0.95   | 1.37   | 0.88  | 1.32   | 1.35  | 1.24  | 0.88     |
|         |                                  | <i>d</i> <sub>max</sub> | 0.99   | 1.55   | 0.88  | 1.46   | 1.35  | 1.24  | 1.55     |
|         |                                  | <i>S</i>                | 184.71 | 275.96 | 22.37 | 97.14  | 11.70 | 14.60 | 606.49   |
|         |                                  | <i>V</i>                | 29.66  | 65.28  | 3.28  | 21.86  | 2.63  | 3.01  | 125.72   |
|         |                                  | $\Delta_S$              | 30.46  | 45.50  | 3.69  | 16.02  | 1.93  | 2.41  | 100.00   |
| sVI     | C <sub>4</sub> H <sub>10</sub> O | <i>k</i>                | 34     | 44     | 4     | 16     | 2     | 2     | 102      |
|         |                                  | <i>d</i> <sub>min</sub> | 0.95   | 1.37   | 0.88  | 1.32   | 1.35  | 1.24  | 0.88     |
|         |                                  | <i>d</i> <sub>max</sub> | 0.99   | 1.52   | 0.88  | 1.46   | 1.35  | 1.24  | 1.52     |
|         |                                  | <i>S</i>                | 182.52 | 278.58 | 21.59 | 100.10 | 11.91 | 13.28 | 607.99   |
|         |                                  | <i>V</i>                | 29.31  | 66.00  | 3.17  | 22.54  | 2.68  | 2.74  | 126.44   |
|         |                                  | $\Delta_S$              | 30.02  | 45.82  | 3.55  | 16.46  | 1.96  | 2.18  | 100.00   |
| sVIIa   | C <sub>4</sub> H <sub>10</sub> O | <i>k</i>                | 34     | 44     | 4     | 16     | 2     | 2     | 102      |
|         |                                  | <i>d</i> <sub>min</sub> | 0.95   | 1.37   | 0.88  | 1.32   | 1.35  | 1.25  | 0.88     |
|         |                                  | <i>d</i> <sub>max</sub> | 0.99   | 1.54   | 0.88  | 1.47   | 1.35  | 1.25  | 1.54     |
|         |                                  | <i>S</i>                | 181.27 | 280.54 | 22.05 | 100.48 | 12.70 | 12.89 | 609.94   |
|         |                                  | <i>V</i>                | 29.11  | 66.40  | 3.24  | 22.63  | 2.86  | 2.68  | 126.92   |
|         |                                  | $\Delta_S$              | 29.72  | 45.99  | 3.62  | 16.47  | 2.08  | 2.11  | 100.00   |
| sVIIb   | C <sub>4</sub> H <sub>10</sub> O | <i>k</i>                | 34     | 44     | 4     | 16     | 2     | 2     | 102      |
|         |                                  | <i>d</i> <sub>min</sub> | 0.95   | 1.37   | 0.88  | 1.32   | 1.35  | 1.24  | 0.88     |
|         |                                  | <i>d</i> <sub>max</sub> | 0.99   | 1.55   | 0.88  | 1.45   | 1.35  | 1.24  | 1.55     |
|         |                                  | <i>S</i>                | 180.77 | 280.18 | 22.93 | 100.84 | 12.10 | 13.31 | 610.12   |
|         |                                  | <i>V</i>                | 29.03  | 66.39  | 3.36  | 22.72  | 2.72  | 2.75  | 126.97   |
|         |                                  | $\Delta_S$              | 29.63  | 45.92  | 3.76  | 16.53  | 1.98  | 2.18  | 100.00   |
| sVIII   | C <sub>5</sub> H <sub>12</sub> O | <i>k</i>                | 34     | 44     | 4     | 16     | 2     | 2     | 102      |
|         |                                  | <i>d</i> <sub>min</sub> | 0.95   | 1.37   | 0.89  | 1.32   | 1.35  | 1.24  | 0.89     |
|         |                                  | <i>d</i> <sub>max</sub> | 0.99   | 1.55   | 0.89  | 1.46   | 1.35  | 1.24  | 1.55     |
|         |                                  | <i>S</i>                | 181.58 | 282.19 | 22.65 | 96.65  | 11.90 | 13.87 | 608.84   |
|         |                                  | <i>V</i>                | 29.16  | 66.94  | 3.36  | 21.77  | 2.67  | 2.86  | 126.76   |
|         |                                  | $\Delta_S$              | 29.82  | 46.35  | 3.72  | 15.87  | 1.95  | 2.28  | 100.00   |

Table S1 (continued)

| Solvate | Solvent molecule                 |                         | H/C    | C/C    | H/N   | C/N   | N/N   | C/O   | $\Sigma$ |
|---------|----------------------------------|-------------------------|--------|--------|-------|-------|-------|-------|----------|
| sIX     | C <sub>4</sub> H <sub>8</sub> O  | <i>k</i>                | 34     | 44     | 4     | 16    | 2     | 2     | 102      |
|         |                                  | <i>d</i> <sub>min</sub> | 0.95   | 1.36   | 0.90  | 1.32  | 1.34  | 1.24  | 0.90     |
|         |                                  | <i>d</i> <sub>max</sub> | 0.99   | 1.56   | 0.96  | 1.46  | 1.34  | 1.24  | 1.56     |
|         |                                  | <i>S</i>                | 181.03 | 274.56 | 22.01 | 98.05 | 12.85 | 13.39 | 601.88   |
|         |                                  | <i>V</i>                | 29.08  | 65.20  | 3.42  | 22.12 | 2.87  | 2.76  | 125.46   |
|         |                                  | $\Delta_S$              | 30.08  | 45.62  | 3.66  | 16.29 | 2.13  | 2.22  | 100.00   |
| sX      | C <sub>4</sub> H <sub>8</sub> O  | <i>k</i>                | 34     | 44     | 4     | 16    | 2     | 2     | 102      |
|         |                                  | <i>d</i> <sub>min</sub> | 0.95   | 1.37   | 0.88  | 1.32  | 1.35  | 1.24  | 0.88     |
|         |                                  | <i>d</i> <sub>max</sub> | 0.99   | 1.55   | 0.88  | 1.46  | 1.35  | 1.24  | 1.55     |
|         |                                  | <i>S</i>                | 179.28 | 280.43 | 23.34 | 95.74 | 12.62 | 13.18 | 604.58   |
|         |                                  | <i>V</i>                | 28.79  | 66.50  | 3.42  | 21.56 | 2.84  | 2.72  | 125.84   |
|         |                                  | $\Delta_S$              | 29.65  | 46.38  | 3.86  | 15.84 | 2.09  | 2.18  | 100.00   |
| sXI     | C <sub>4</sub> H <sub>9</sub> NO | <i>k</i>                | 34     | 44     | 4     | 16    | 2     | 2     | 102      |
|         |                                  | <i>d</i> <sub>min</sub> | 0.95   | 1.37   | 0.89  | 1.32  | 1.35  | 1.24  | 0.89     |
|         |                                  | <i>d</i> <sub>max</sub> | 0.99   | 1.55   | 0.95  | 1.47  | 1.35  | 1.24  | 1.55     |
|         |                                  | <i>S</i>                | 179.88 | 271.13 | 24.54 | 93.43 | 12.76 | 13.06 | 594.79   |
|         |                                  | <i>V</i>                | 28.89  | 64.25  | 3.74  | 21.05 | 2.87  | 2.70  | 123.51   |
|         |                                  | $\Delta_S$              | 30.24  | 45.58  | 4.13  | 15.71 | 2.14  | 2.20  | 100.00   |

Table S2. Characteristics of intramolecular noncovalent interactions of GAL molecules in different GAL·Q solvates (VD polyhedra faces with RF > 1)

| Solvate | Solvent molecule                |                         | H/H    | H/C   | C/C  | H/N   | C/N   | N/N | H/O   | C/O  | N/O | O/O | $\Sigma$ |
|---------|---------------------------------|-------------------------|--------|-------|------|-------|-------|-----|-------|------|-----|-----|----------|
| sI      | H <sub>2</sub> O                | <i>k</i>                | 48     | 126   | 42   | 24    | 28    |     | 4     | 2    |     |     | 274      |
|         |                                 | <i>d</i> <sub>min</sub> | 1.52   | 1.93  | 2.29 | 1.95  | 2.11  |     | 2.45  | 2.37 |     |     | 1.52     |
|         |                                 | <i>d</i> <sub>max</sub> | 4.09   | 4.88  | 3.23 | 3.32  | 3.73  |     | 2.46  | 2.37 |     |     | 4.88     |
|         |                                 | <i>S</i>                | 116.41 | 78.35 | 4.66 | 35.12 | 16.50 |     | 8.83  | 0.27 |     |     | 260.12   |
|         |                                 | <i>V</i>                | 40.89  | 34.93 | 1.93 | 15.01 | 7.95  |     | 3.62  | 0.11 |     |     | 104.44   |
|         |                                 | $\Delta_S$              | 44.75  | 30.12 | 1.79 | 13.50 | 6.34  |     | 3.39  | 0.10 |     |     | 100.00   |
| sII     | CH <sub>4</sub> O               | <i>k</i>                | 46     | 112   | 34   | 28    | 24    |     | 4     | 2    |     |     | 250      |
|         |                                 | <i>d</i> <sub>min</sub> | 1.52   | 1.93  | 2.21 | 1.96  | 2.11  |     | 2.46  | 2.37 |     |     | 1.52     |
|         |                                 | <i>d</i> <sub>max</sub> | 4.13   | 4.26  | 3.25 | 3.91  | 3.19  |     | 2.46  | 2.37 |     |     | 4.26     |
|         |                                 | <i>S</i>                | 113.18 | 59.39 | 3.37 | 33.47 | 13.15 |     | 9.27  | 0.40 |     |     | 232.22   |
|         |                                 | <i>V</i>                | 39.50  | 24.66 | 1.35 | 13.84 | 6.13  |     | 3.79  | 0.16 |     |     | 89.43    |
|         |                                 | $\Delta_S$              | 48.74  | 25.58 | 1.45 | 14.41 | 5.66  |     | 3.99  | 0.17 |     |     | 100.00   |
| sIII    | C <sub>2</sub> H <sub>6</sub> O | <i>k</i>                | 48     | 126   | 36   | 28    | 24    |     | 6     | 12   |     |     | 280      |
|         |                                 | <i>d</i> <sub>min</sub> | 1.57   | 1.90  | 2.20 | 1.92  | 2.10  |     | 2.39  | 2.36 |     |     | 1.57     |
|         |                                 | <i>d</i> <sub>max</sub> | 4.25   | 4.70  | 4.27 | 4.49  | 3.07  |     | 4.68  | 4.47 |     |     | 4.70     |
|         |                                 | <i>S</i>                | 133.97 | 98.85 | 4.71 | 41.99 | 13.76 |     | 11.23 | 6.31 |     |     | 310.81   |
|         |                                 | <i>V</i>                | 47.19  | 45.05 | 1.99 | 17.97 | 6.48  |     | 4.64  | 4.25 |     |     | 127.56   |
|         |                                 | $\Delta_S$              | 43.10  | 31.80 | 1.52 | 13.51 | 4.43  |     | 3.61  | 2.03 |     |     | 100.00   |
| sIV     | C <sub>2</sub> H <sub>6</sub> O | <i>k</i>                | 54     | 116   | 50   | 24    | 26    |     | 4     | 2    |     |     | 276      |
|         |                                 | <i>d</i> <sub>min</sub> | 1.52   | 1.93  | 2.21 | 1.95  | 2.11  |     | 2.45  | 2.38 |     |     | 1.52     |
|         |                                 | <i>d</i> <sub>max</sub> | 4.50   | 4.23  | 4.62 | 4.23  | 4.36  |     | 2.46  | 2.38 |     |     | 4.62     |
|         |                                 | <i>S</i>                | 140.96 | 85.30 | 6.46 | 26.48 | 14.10 |     | 11.31 | 0.02 |     |     | 284.62   |
|         |                                 | <i>V</i>                | 50.34  | 38.79 | 3.37 | 10.92 | 6.68  |     | 4.63  | 0.01 |     |     | 114.72   |
|         |                                 | $\Delta_S$              | 49.53  | 29.97 | 2.27 | 9.30  | 4.95  |     | 3.97  | 0.01 |     |     | 100.00   |
| sV      | C <sub>3</sub> H <sub>8</sub> O | <i>k</i>                | 48     | 126   | 40   | 28    | 28    |     | 4     | 10   |     |     | 284      |
|         |                                 | <i>d</i> <sub>min</sub> | 1.52   | 1.93  | 2.21 | 1.95  | 2.11  |     | 2.45  | 2.37 |     |     | 1.52     |
|         |                                 | <i>d</i> <sub>max</sub> | 3.89   | 4.29  | 4.17 | 3.75  | 3.07  |     | 2.47  | 4.58 |     |     | 4.58     |
|         |                                 | <i>S</i>                | 110.07 | 89.74 | 5.58 | 28.07 | 13.42 |     | 12.03 | 5.60 |     |     | 264.49   |
|         |                                 | <i>V</i>                | 38.76  | 39.21 | 2.67 | 11.53 | 6.25  |     | 4.92  | 3.60 |     |     | 106.93   |
|         |                                 | $\Delta_S$              | 41.62  | 33.93 | 2.11 | 10.61 | 5.07  |     | 4.55  | 2.12 |     |     | 100.00   |

Table S2 (continued)

| Solvate | Solvent molecule                 |                         | H/H    | H/C   | C/C  | H/N   | C/N   | N/N | H/O   | C/O  | N/O | O/O | $\Sigma$ |
|---------|----------------------------------|-------------------------|--------|-------|------|-------|-------|-----|-------|------|-----|-----|----------|
| sVI     | C <sub>4</sub> H <sub>10</sub> O | <i>k</i>                | 46     | 116   | 40   | 26    | 24.00 |     | 4     | 6    |     |     | 262      |
|         |                                  | <i>d</i> <sub>min</sub> | 1.52   | 1.93  | 2.21 | 1.95  | 2.11  |     | 2.42  | 2.37 |     |     | 1.52     |
|         |                                  | <i>d</i> <sub>max</sub> | 3.60   | 4.01  | 3.78 | 4.08  | 3.09  |     | 2.46  | 4.53 |     |     | 4.53     |
|         |                                  | <i>S</i>                | 114.01 | 80.24 | 3.95 | 31.61 | 12.73 |     | 11.59 | 2.34 |     |     | 256.47   |
|         |                                  | <i>V</i>                | 39.88  | 34.85 | 1.64 | 12.99 | 5.98  |     | 4.69  | 1.59 |     |     | 101.62   |
|         |                                  | $\Delta_S$              | 44.45  | 31.29 | 1.54 | 12.33 | 4.96  |     | 4.52  | 0.91 |     |     | 100.00   |
| sVIIa   | C <sub>4</sub> H <sub>10</sub> O | <i>k</i>                | 42     | 116   | 34   | 28    | 22    |     | 4     | 12   |     |     | 258      |
|         |                                  | <i>d</i> <sub>min</sub> | 1.52   | 1.93  | 2.21 | 1.96  | 2.11  |     | 2.46  | 2.37 |     |     | 1.52     |
|         |                                  | <i>d</i> <sub>max</sub> | 3.22   | 4.75  | 3.82 | 4.82  | 3.13  |     | 2.46  | 4.65 |     |     | 4.82     |
|         |                                  | <i>S</i>                | 117.72 | 81.52 | 4.71 | 32.62 | 13.86 |     | 11.22 | 1.80 |     |     | 263.45   |
|         |                                  | <i>V</i>                | 41.33  | 35.74 | 1.93 | 13.57 | 6.55  |     | 4.60  | 1.17 |     |     | 104.87   |
|         |                                  | $\Delta_S$              | 44.68  | 30.94 | 1.79 | 12.38 | 5.26  |     | 4.26  | 0.68 |     |     | 100.00   |
| sVIIb   | C <sub>4</sub> H <sub>10</sub> O | <i>k</i>                | 44     | 122   | 38   | 26    | 22    |     | 4     | 6    |     |     | 262      |
|         |                                  | <i>d</i> <sub>min</sub> | 1.52   | 1.93  | 2.21 | 1.95  | 2.12  |     | 2.46  | 2.38 |     |     | 1.52     |
|         |                                  | <i>d</i> <sub>max</sub> | 3.28   | 4.40  | 3.87 | 3.88  | 3.15  |     | 2.47  | 4.75 |     |     | 4.75     |
|         |                                  | <i>S</i>                | 112.70 | 80.73 | 4.63 | 35.14 | 13.57 |     | 11.13 | 0.96 |     |     | 258.86   |
|         |                                  | <i>V</i>                | 39.79  | 35.03 | 1.99 | 14.68 | 6.39  |     | 4.58  | 0.54 |     |     | 102.98   |
|         |                                  | $\Delta_S$              | 43.54  | 31.19 | 1.79 | 13.57 | 5.24  |     | 4.30  | 0.37 |     |     | 100.00   |
| sVIII   | C <sub>5</sub> H <sub>12</sub> O | <i>k</i>                | 44     | 120   | 36   | 26    | 22    |     | 4     | 6    |     |     | 258      |
|         |                                  | <i>d</i> <sub>min</sub> | 1.53   | 1.92  | 2.21 | 1.95  | 2.11  |     | 2.40  | 2.37 |     |     | 1.53     |
|         |                                  | <i>d</i> <sub>max</sub> | 3.27   | 4.46  | 3.78 | 4.08  | 3.12  |     | 2.43  | 4.47 |     |     | 4.47     |
|         |                                  | <i>S</i>                | 103.81 | 76.60 | 4.69 | 28.73 | 14.35 |     | 11.20 | 1.13 |     |     | 240.53   |
|         |                                  | <i>V</i>                | 36.44  | 33.22 | 2.01 | 11.90 | 6.80  |     | 4.49  | 0.76 |     |     | 95.63    |
|         |                                  | $\Delta_S$              | 43.16  | 31.85 | 1.95 | 11.94 | 5.97  |     | 4.66  | 0.47 |     |     | 100.00   |
| sIX     | C <sub>4</sub> H <sub>8</sub> O  | <i>k</i>                | 50     | 108   | 36   | 26    | 22    |     | 4     | 2    |     |     | 248      |
|         |                                  | <i>d</i> <sub>min</sub> | 1.56   | 1.93  | 2.21 | 1.95  | 2.11  |     | 2.42  | 2.38 |     |     | 1.56     |
|         |                                  | <i>d</i> <sub>max</sub> | 4.26   | 4.17  | 2.80 | 3.78  | 3.09  |     | 2.46  | 2.38 |     |     | 4.26     |
|         |                                  | <i>S</i>                | 107.38 | 54.99 | 3.18 | 33.51 | 11.64 |     | 10.19 | 0.07 |     |     | 220.96   |
|         |                                  | <i>V</i>                | 37.32  | 22.74 | 1.27 | 14.24 | 5.42  |     | 4.17  | 0.03 |     |     | 85.20    |
|         |                                  | $\Delta_S$              | 48.59  | 24.89 | 1.44 | 15.16 | 5.27  |     | 4.61  | 0.03 |     |     | 100.00   |
| sX      | C <sub>4</sub> H <sub>8</sub> O  | <i>k</i>                | 48     | 100   | 38   | 20    | 24    |     | 4     | 2    |     |     | 236      |
|         |                                  | <i>d</i> <sub>min</sub> | 1.52   | 1.93  | 2.21 | 1.95  | 2.12  |     | 2.44  | 2.37 |     |     | 1.52     |
|         |                                  | <i>d</i> <sub>max</sub> | 3.26   | 4.69  | 3.23 | 3.32  | 4.05  |     | 2.45  | 2.37 |     |     | 4.69     |
|         |                                  | <i>S</i>                | 116.04 | 57.12 | 3.67 | 27.72 | 10.65 |     | 11.49 | 0.09 |     |     | 226.78   |
|         |                                  | <i>V</i>                | 41.45  | 23.18 | 1.47 | 10.96 | 5.10  |     | 4.67  | 0.04 |     |     | 86.87    |
|         |                                  | $\Delta_S$              | 51.17  | 25.19 | 1.62 | 12.22 | 4.69  |     | 5.07  | 0.04 |     |     | 100.00   |

Table S2 (continued)

| Solvate | Solvent molecule                 |                         | H/H    | H/C   | C/C  | H/N   | C/N   | N/N | H/O  | C/O  | N/O | O/O | $\Sigma$ |
|---------|----------------------------------|-------------------------|--------|-------|------|-------|-------|-----|------|------|-----|-----|----------|
| sXI     | C <sub>4</sub> H <sub>9</sub> NO | <i>k</i>                | 46     | 104   | 48   | 26    | 26    |     | 4    | 2    |     |     | 256      |
|         |                                  | <i>d</i> <sub>min</sub> | 1.58   | 1.96  | 2.21 | 1.95  | 2.12  |     | 2.43 | 2.37 |     |     | 1.58     |
|         |                                  | <i>d</i> <sub>max</sub> | 3.44   | 4.49  | 3.21 | 4.13  | 3.83  |     | 2.47 | 2.37 |     |     | 4.49     |
|         |                                  | <i>S</i>                | 119.38 | 60.37 | 3.39 | 33.05 | 11.84 |     | 9.30 | 0.21 |     |     | 237.53   |
|         |                                  | <i>V</i>                | 41.98  | 25.92 | 1.37 | 13.67 | 5.70  |     | 3.82 | 0.08 |     |     | 92.53    |
|         |                                  | $\Delta_S$              | 50.26  | 25.41 | 1.43 | 13.91 | 4.98  |     | 3.92 | 0.09 |     |     | 100.00   |
